# Supplementary material
Source: PubMed Central journal article supplement (PMC6534199)
Supplement: IORT_A_1590769_SM5228.pdf [file IORT_A_1590769_SM5228.pdf]

## Supplementary data

Table 3. Number of measurements according to age and GMFCS level

| Age   | Unclassified | GMFCS level |       |       |       |        | Total  |
|-------|--------------|-------------|-------|-------|-------|--------|--------|
|       |              | I           | II    | III   | IV    | V      |        |
| < 2   | 251          | 1,018       | 480   | 328   | 808   | 848    | 3,733  |
| 2–3   | 696          | 4,452       | 2,069 | 1,268 | 2,130 | 2,253  | 12,868 |
| 4–5   | 632          | 5,217       | 2,408 | 1,288 | 2,322 | 2,570  | 14,437 |
| 6–7   | 318          | 3,201       | 1,427 | 750   | 1,362 | 1,636  | 8,694  |
| 8–9   | 212          | 2,450       | 1,141 | 580   | 1,098 | 1,331  | 6,812  |
| 10–11 | 137          | 1,868       | 836   | 458   | 786   | 1,022  | 5,107  |
| 12–13 | 103          | 1,354       | 662   | 362   | 602   | 782    | 3,865  |
| 14–15 | 80           | 822         | 457   | 226   | 362   | 490    | 2,437  |
| Total | 2,429        | 20,382      | 9,480 | 5,260 | 9,470 | 10,932 | 57,953 |

Table 4. Results of the mixed model analysis

| Variable                                    | Effect size (CI)          | p-value |
|---------------------------------------------|---------------------------|---------|
| Fixed effect parameters                     |                           |         |
| Mean difference per year in birth years     | -0.019 (-0.023 to -0.014) | < 0.001 |
| Mean difference between girls and boys      | -0.072 (-0.114 to -0.034) | < 0.001 |
| Annual rate of change before 5 years of age |                           |         |
| GMFCS I                                     | 0.025 (0.007 to 0.044)    | 0.007   |
| GMFCS II                                    | 0.020 (-0.009 to 0.048)   | 0.2     |
| GMFCS III                                   | -0.009 (-0.047 to 0.028)  | 0.6     |
| GMFCS IV                                    | 0.056 (0.028 to 0.084)    | < 0.001 |
| GMFCS V                                     | 0.066 (0.039 to 0.093)    | < 0.001 |
| Annual rate of change after 5 years of age  |                           |         |
| GMFCS I                                     | -0.040 (-0.049 to -0.031) | < 0.001 |
| GMFCS II                                    | -0.040 (-0.054 to -0.025) | < 0.001 |
| GMFCS III                                   | -0.054 (-0.074 to -0.033) | < 0.001 |
| GMFCS IV                                    | -0.078 (-0.094 to -0.062) | < 0.001 |
| GMFCS V                                     | -0.074 (-0.089 to -0.060) | < 0.001 |

CI: 95% confidence interval
